# Supplementary material for: Disrupted mitochondrial response to nutrients is a presymptomatic event in the cortex of the APPSAA knock‐in mouse model of Alzheimer's disease
Source: PubMed Central journal article supplement — Alzheimers Dement. 2024 Aug 22;20(10):6844–59. doi: 10.1002/alz.14144 (PMC11485302; doi:10.1002/alz.14144), 2024-08-22
Supplement: ALZ-20-6844-s001.pdf [file ALZ-20-6844-s001.pdf]

# Supplemental Figure 1

## Norambuena et al.

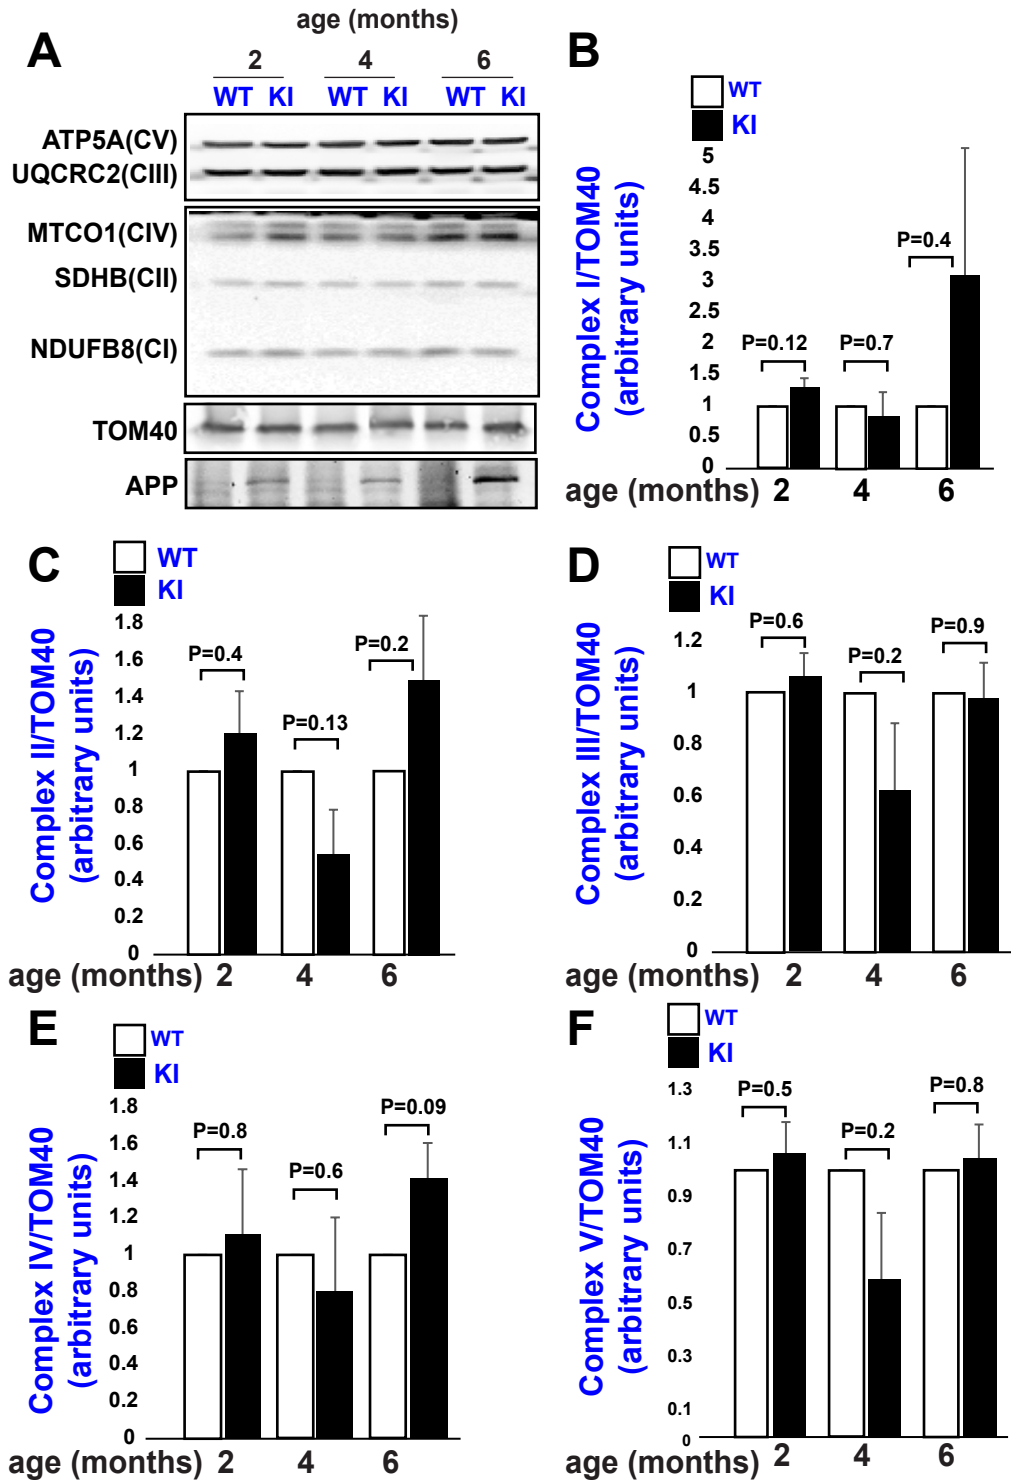

**Supplemental Figure 1. WT and APP<sup>SAA</sup> mice cortex express similar levels of electron transport chain (ETC) subunits in the cortex.**

A, Cortical protein samples were separated by SDS-PAGE followed by western blots of the indicated proteins. The blots shown are representative of 3 independent experiments. B-F, The expression levels of each of the indicated subunits of the electron transport chain (CI-CV, or Complex I-V) were normalized to expression of TOM40 (mitochondrial marker) detected on each sample. Bar graphs show the quantification obtained using 3 mice/group/genetic background and analyzed using Student's two-tailed unpaired t-test.
