# Supplementary material for: Disrupted mitochondrial response to nutrients is a presymptomatic event in the cortex of the APPSAA knock‐in mouse model of Alzheimer's disease
Source: PubMed Central journal article supplement — Alzheimers Dement. 2024 Aug 22;20(10):6844–59. doi: 10.1002/alz.14144 (PMC11485302; doi:10.1002/alz.14144), 2024-08-22
Supplement: ALZ-20-6844-s002.pdf [file ALZ-20-6844-s002.pdf]

## Supplemental Figure 2 Norambuena et al.

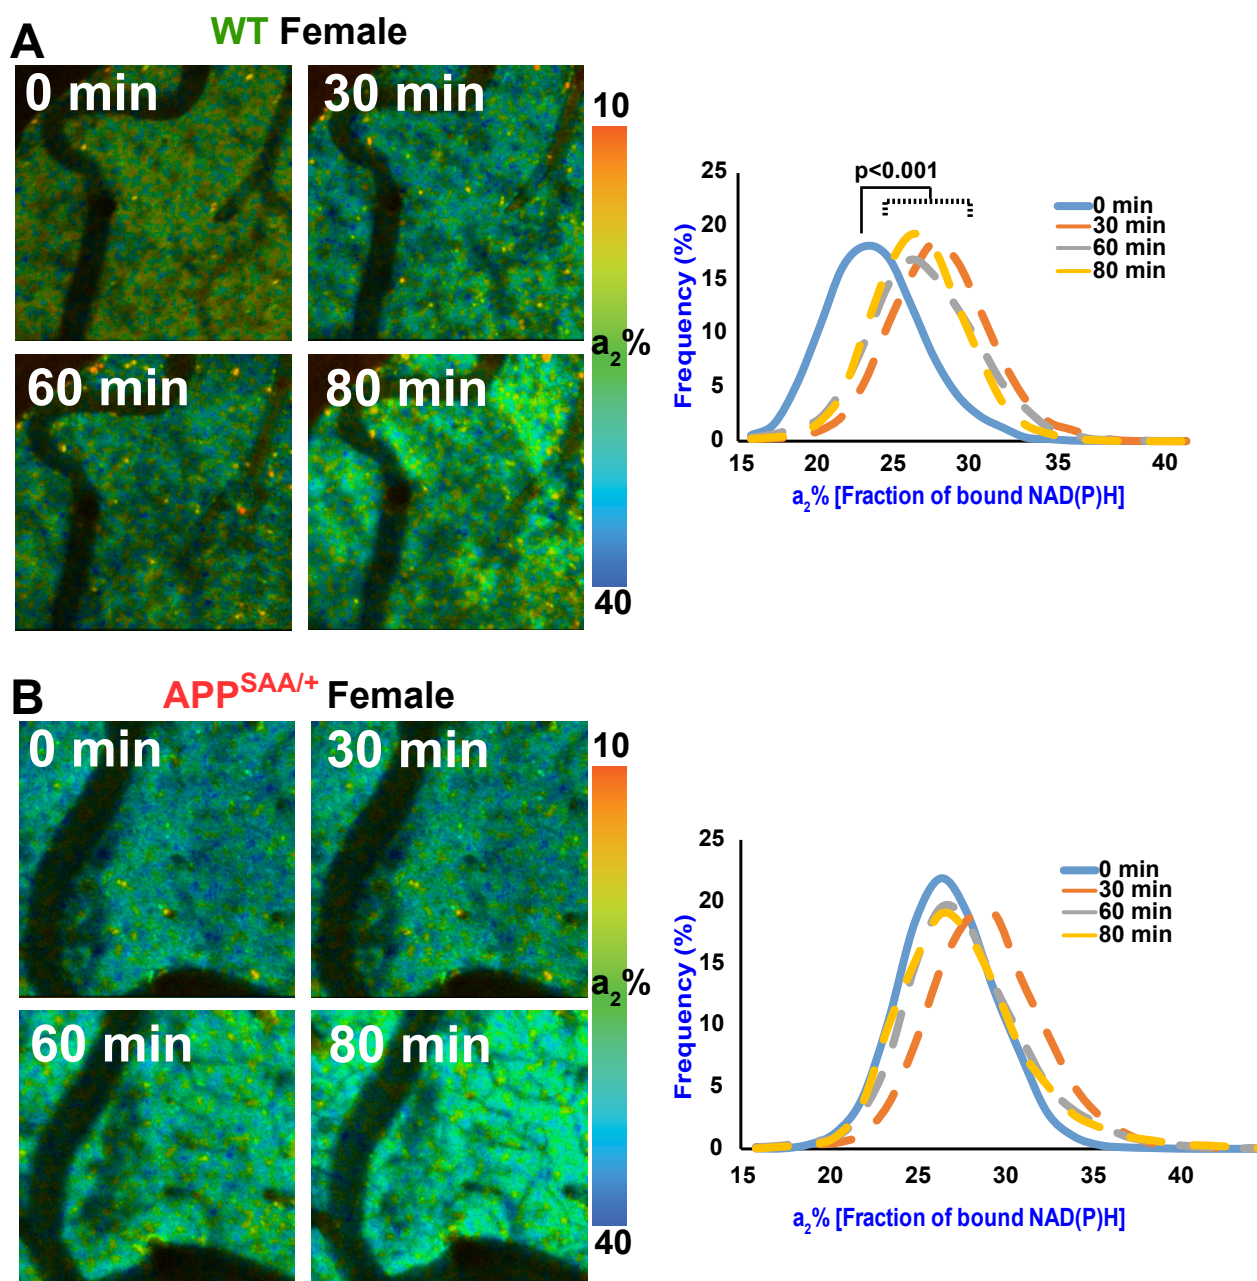

### Supplemental Figure 2. NiMA is also disrupted in female APPSAA/+ brain.

A, 2P-FLIM imaging of WT female cerebral cortex through an open-skull window before and after topical application of amino acids (R+L). An increase in  $a_2\%$  was observed for several minutes indicating upregulation of mitochondrial activity. Statistical analyses were performed using Student's two-tailed paired t-test. 3 females were used in these experiments. B- A similar experiment was performed using a female APPSAA/+ mouse cerebral cortex. Like we observed in males, NiMA is also blocked in the 4-month-old females. Graphs show the quantification of 3 independent experiments. Statistical analyses were performed using Student's two-tailed paired t-test. Comparisons between time 0 and 30, 60 and 80 minutes in histograms resulted in p values  $>0.05$ .
